# Supplementary material for: Chitosan Coating Inhibits the Growth of Listeria monocytogenes and Extends the Shelf Life of Vacuum-Packed Pork Loins at 4 °C
Source: MDPI journal article supplement (doi:10.3390/foods7100155), 2018-09-25
Supplement: s1 [file s1]

# Supplementary Materials: Chitosan Coating Inhibits the Growth of *Listeria monocytogenes* and Extends the Shelf Life of Vacuum-Packed Pork Loins at 4 °C

Annalisa Serio, Clemencia Chaves-López, Giampiero Sacchetti, Chiara Rossi and Antonello Paparella \*

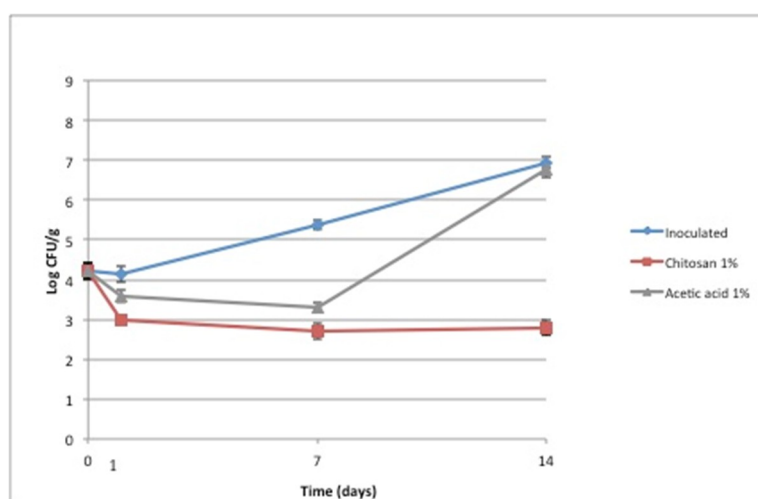

(a)

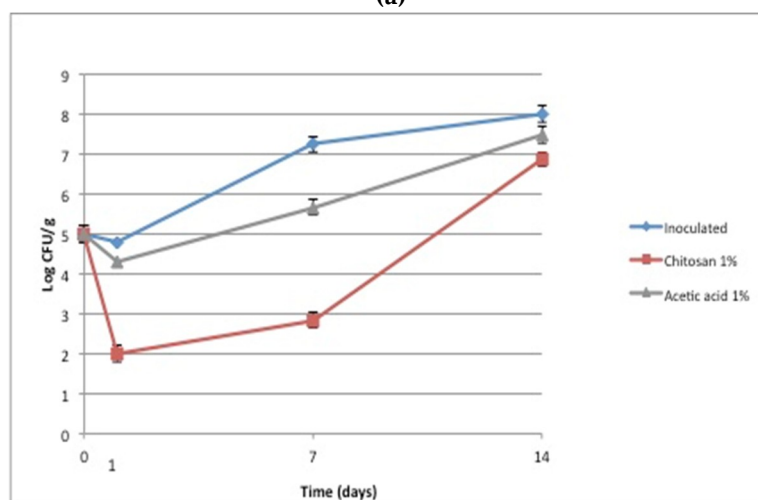

(b)

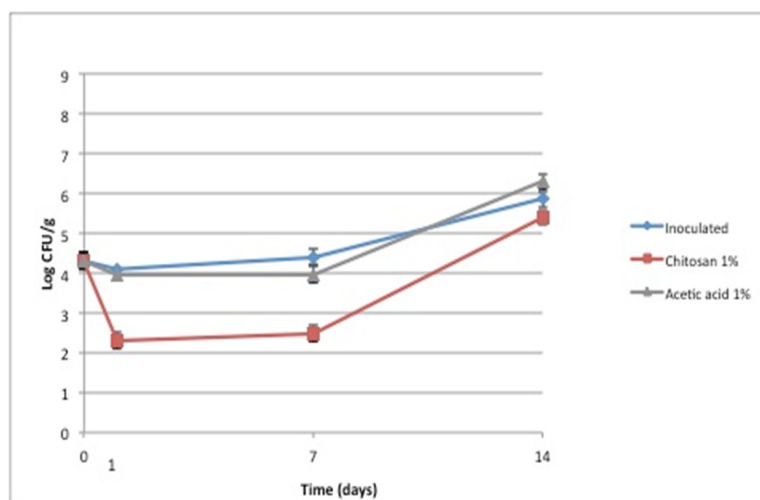

(c)

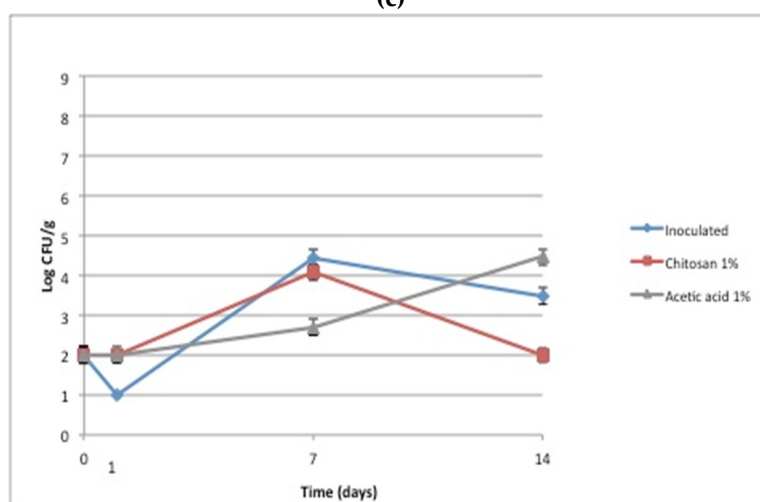

(d)

**Figure S1.** Evolution of microbial parameters of vacuum-packed pork loin samples inoculated with *Listeria monocytogenes* (inoculated) and treated with chitosan 1% or acetic acid 1%, stored at 4°C for 14 days. (a) *Listeria monocytogenes*; (b) mesophilic aerobic count; (c) lactic acid bacteria; (d) yeasts.
